# Supplementary material for: New Developments in the Synthesis of EMICORON
Source: Preprints.org preprint supplement (doi:10.20944/preprints201807.0515.v1), 2018-07-26
Supplement: Supplementary file 1 [file Supplementary emicoron.docx]

1H-NMR spectrum of PIPER-Br

1H-NMR spectrum of PIP-PIPER-Br
